# Supplementary material for: Impact of stromal tumor-infiltrating lymphocytes (sTILs) on response to neoadjuvant chemotherapy in triple-negative early breast cancer in the WSG-ADAPT TN trial
Source: Springer Nature journal article supplement (doi:10.1186/s13058-022-01552-w), 2022-09-02

Suppl Figure 2

3A

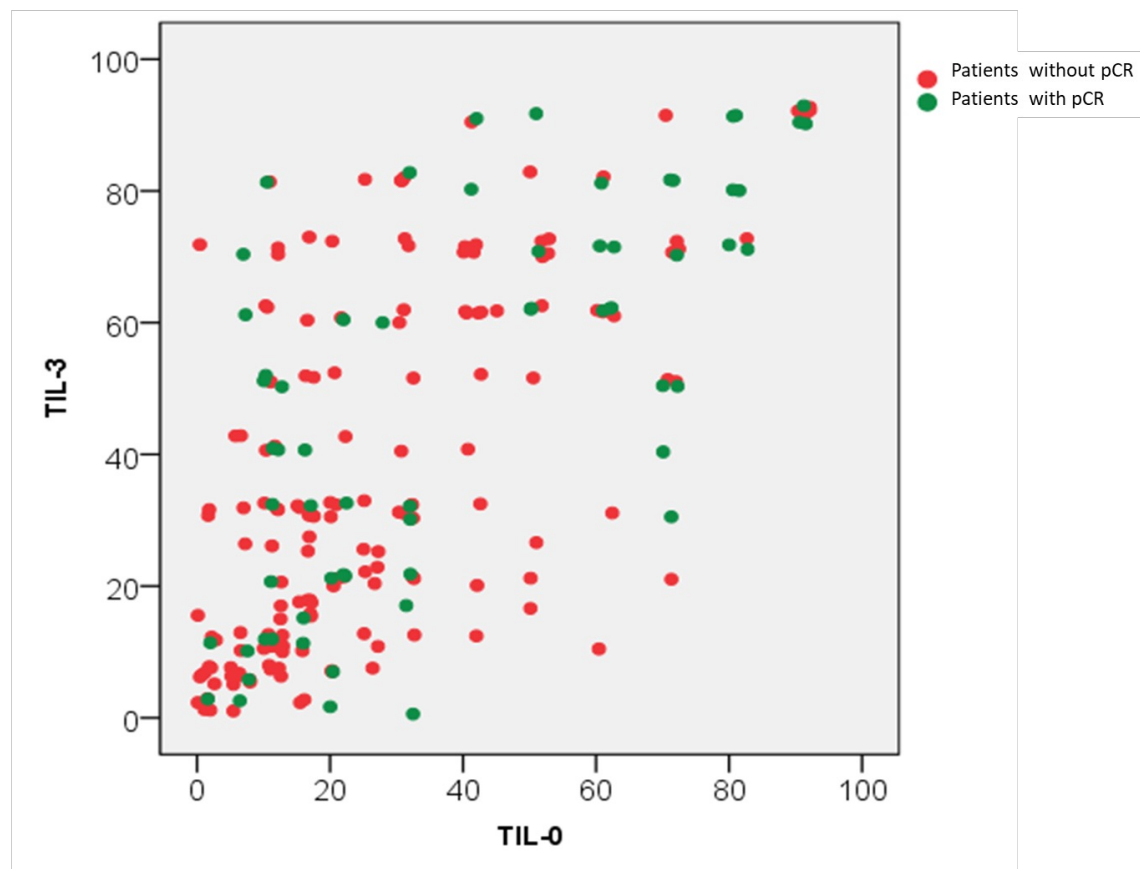

Supplement: MOESM2 [file 23447612]
